# Supplementary material
Source: PubMed Central journal article supplement (PMC8292453)
Supplement: NIHMS1657665-supplement-Supplementary_Material.pdf [file NIHMS1657665-supplement-Supplementary_Material.pdf]

## Glossary:

|                   |                                                              |
|-------------------|--------------------------------------------------------------|
| <b>AMD</b>        | age-related macular degeneration                             |
| <b>ATF4</b>       | activating transcription factor 4                            |
| <b>cAMP</b>       | cyclic adenosine monophosphate                               |
| <b>C/EBP</b>      | CCAAT/enhancer binding proteins                              |
| <b>CHOP</b>       | C/EBP homologous protein                                     |
| <b>CREB</b>       | cAMP responsive element-binding protein                      |
| <b>CReP</b>       | constitutive repressor of eIF2 $\alpha$ phosphorylation      |
| <b>DR</b>         | diabetic retinopathy                                         |
| <b>dsRNA</b>      | double-stranded ribonucleic acid                             |
| <b>eIF2</b>       | eukaryotic translation initiation factor 2                   |
| <b>ER</b>         | endoplasmic reticulum                                        |
| <b>GADD34</b>     | growth arrest and DNA-damage inducible protein 34            |
| <b>GCN2</b>       | general control non-depressible protein 2                    |
| <b>GCD</b>        | granular corneal dystrophy                                   |
| <b>GDP</b>        | guanosine diphosphate                                        |
| <b>GTP</b>        | guanosine-5'-triphosphate                                    |
| <b>HRI</b>        | heme-regulated inhibitor/heme-regulated eIF2 $\alpha$ kinase |
| <b>HSV</b>        | herpes simplex virus                                         |
| <b>ISR</b>        | integrated stress response                                   |
| <b>ISRIB</b>      | integrated stress response inhibitor                         |
| <b>MMP</b>        | matrix metalloprotease                                       |
| <b>mRNA</b>       | messenger RNA                                                |
| <b>met-tRNA</b>   | methylated-transfer RNA                                      |
| <b>PERK</b>       | PKR-like endoplasmic reticulum kinase                        |
| <b>PKR</b>        | double-stranded RNA-dependent protein kinase                 |
| <b>PKA</b>        | protein kinase A                                             |
| <b>Poly (I:C)</b> | polyinosinic:polycytidylic acid                              |
| <b>PP1</b>        | protein phosphatase 1                                        |
| <b>PPP1R15A</b>   | protein phosphatase 1 regulatory subunit 15A                 |
| <b>PPP1R15B</b>   | protein phosphatase 1 regulatory subunit 15B                 |
| <b>ERAD:</b>      | endoplasmic reticulum associated protein degradation         |

|              |                                                  |
|--------------|--------------------------------------------------|
| <b>ROS</b>   | reactive oxygen species                          |
| <b>RPE</b>   | retinal pigment epithelium                       |
| <b>RSK2</b>  | ribosomal S6 kinase alpha-2                      |
| <b>SyK</b>   | spleen-associated tyrosine kinase                |
| <b>TGFBI</b> | transforming growth factor $\beta$ -induced gene |
| <b>VEGF</b>  | vascular endothelial growth factor               |
